# Supplementary material for: Effect of periosteal resection on longitudinal bone growth in a mouse model of achondroplasia
Source: PubMed Central journal article supplement (PMC7451876; doi:10.1016/j.bonr.2020.100708), 2020-08-13
Supplement: mmc3.pdf [file mmc3.pdf]

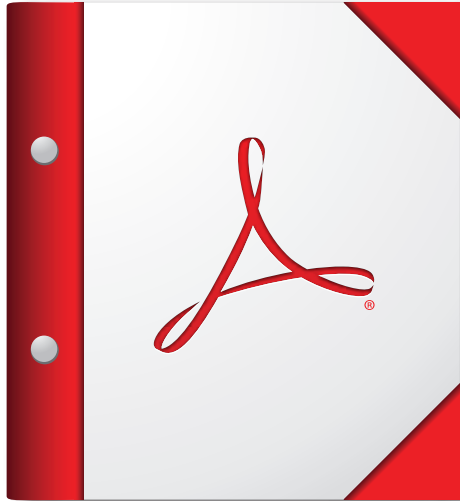

**For the best experience, open this PDF portfolio in  
Acrobat X or Adobe Reader X, or later.**

[Get Adobe Reader Now!](#)
